# Supplementary material for: A G-triplex based molecular beacon for label-free fluorescence “turn-on” detection of bleomycin
Source: Royal Society of Chemistry journal article supplement (doi:10.1039/c8an01208c), 2018-01-01
Supplement: c8an01208c1.pdf [file c8an01208c1.pdf]

## ***Supplementary Information***

### **G-triplex based molecular beacon for label-free fluorescence “turn-on” detection of bleomycin**

Lin Ma, Xue Han, Lian Xia, Rong-Mei Kong\*, Fengli Qu\*

*College of Chemistry and Chemical Engineering, Qufu Normal University, Qufu  
Shandong 273165, P. R. China.*

\* To whom correspondence should be addressed.

E-mail: [kongrongmei@126.com](mailto:kongrongmei@126.com); [fengliqun@hotmail.com](mailto:fengliqun@hotmail.com)

Tel/fax: (+86) 537-4456301

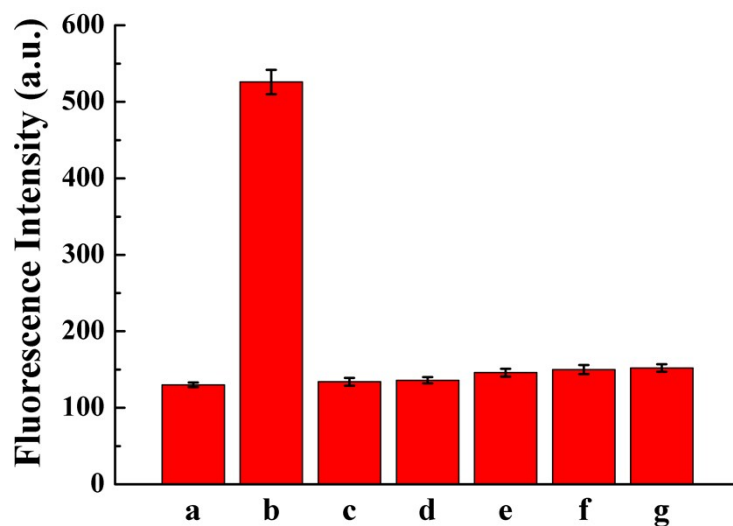

**Fig. S1.** Fluorescence responses of G3MB sensing system at different conditions: (a) blank, (b) 500 nM BLM-Fe(II), (c) 2  $\mu$ M Fe(II), (d) 4  $\mu$ M Fe(II), (e) 6  $\mu$ M Fe(II), (f) 8  $\mu$ M Fe(II), (g) 10  $\mu$ M Fe(II). The concentrations of ThT and G3MB are 6  $\mu$ M and 100 nM, respectively. Error bars were estimated from three replicate measurements.

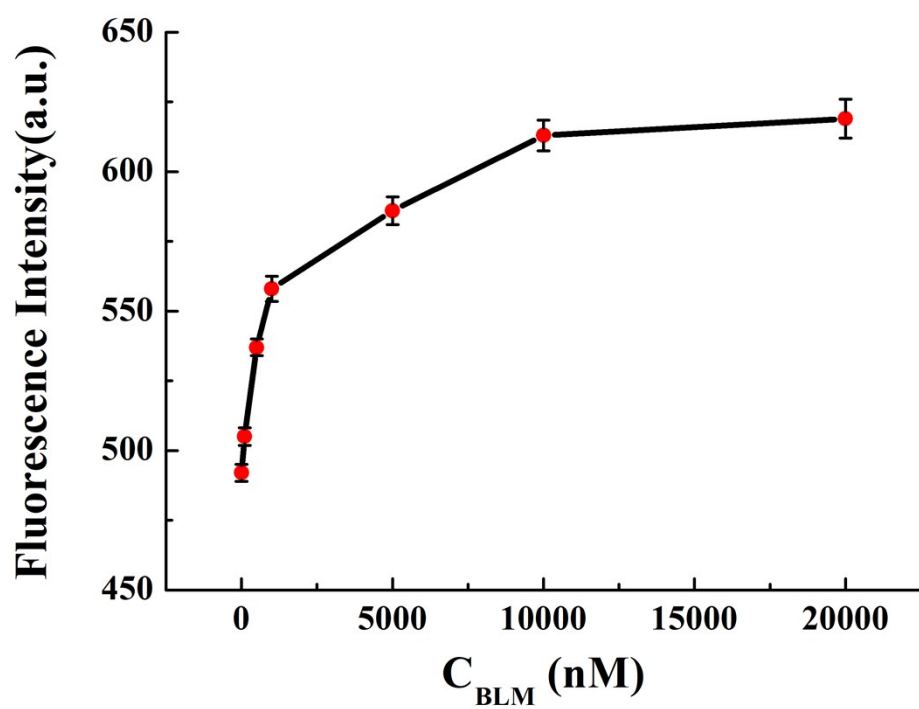

**Fig. S2.** The relationship between BLM concentration and fluorescence intensity at 487 nm under the excitation at 442 nm for G4MB sensing system. Error bars were estimated from three replicate measurements.

**Table S1.** Comparison of the assay performance of various methods for BLM detection

| Method and materials                                                                   | LOD (nM) | Linear range (nM) | Total Time | Ref.      |
|----------------------------------------------------------------------------------------|----------|-------------------|------------|-----------|
| Electrochemistry (ferrocene-modified hairpin DNA)                                      | 0.1      | 0.1~1000          | 6.5 h      | 1         |
| Electrochemistry (graphene oxide-phenylboronic acid labeled ssDNA)                     | 0.01     | 0.02~1200         | >20 h      | 2         |
| Electrogenerated chemiluminescence (SH-modified hairpin DNA/ Ru(phen) <sup>2+3</sup> ) | 0.00003  | 0.00001~0.05      | 12 h       | 3         |
| Colorimetry (unmodified gold nanoparticles)                                            | 2        | 2~150             | 7.5 min    | 4         |
| Colorimetry (Fe(II)-H <sub>2</sub> O <sub>2</sub> -ABTS)                               | 16       | 25~1000           | 20 min     | 5         |
| Fluorescence (exonuclease III-aided DNA recycling amplification)                       | 0.00038  | 0.001~10          | 40 min     | 6         |
| Fluorescence (DNA-templated silver nanoclusters)                                       | 54       | 100~700           | 60 min     | 7         |
| Fluorescence (graphene oxide-DNA complex)                                              | 0.2      | 5~1000            | 30 min     | 8         |
| Fluorescence (WS <sub>2</sub> nanosheet-DNA complex)                                   | 0.3      | 0.5~1000          | 23 min     | 9         |
| Fluorescence (DNA-perylene complex)                                                    | 0.2      | 0.5~100           | 40 min     | 10        |
| Fluorescence (bicyclo-hairpin probe)                                                   | 0.34     | 2~220             | 100 min    | 11        |
| Fluorescence (G-triplex based molecular beacon)                                        | 0.2      | 0.5~1000          | 30 min     | This work |

**Table S2.** Detection of BLM spiked in human serum samples with the fixed Fe (II) concentration at 100 nM.

| Sample   | Added (nM) | Found (nM) | Recovery (%) | RSD (n=3, %) |
|----------|------------|------------|--------------|--------------|
| Serum I  | 20.0       | 20.8       | 104.0        | 3.3          |
|          | 100.0      | 99.7       | 99.7         | 2.9          |
|          | 500.0      | 118.6      | 23.7         | 5.8          |
| Serum II | 20.0       | 19.5       | 97.5         | 4.6          |
|          | 100.0      | 101.9      | 101.9        | 3.4          |
|          | 500.0      | 113.5      | 22.7         | 5.2          |

## References

1. B. Yin, D. Wu and B. Ye, *Anal. Chem.*, 2010, 82, 8272-8277.
2. W. Liu, Y. Zhang, X. Zhang, X. He, X. Zhang and J. Chen, *New J. Chem.*, 2014, 38, 2284-2291.
3. Y. Li, C.C. Huang, J.B. Zheng, H.L. Qi, W. Cao and Y.M. Wei, *Biosens. Bioelectron.*, 2013, 44, 177-182.
4. F. Li, Y. Feng, C. Zhao and B. Tang, *Biosens. Bioelectron.*, 2011, 26: 4628-4631.
5. Y. Qin, L. Zhang, G. Ye and S. Zhao, *Anal. Methods.*, 2014, 6, 7973-7977.
6. F. Gao, J. Lei and H. Ju, *Chem. Commun.*, 2013, 49, 7561-7563.
7. Y. Chang, P. Zhang, Y. Yu, Y. Du, W. Wang and C. Huang, *Anal. Methods.*, 2013, 5, 6200-6204.
8. F. Li, Y. Feng, C. Zhao, P. Li and B. Tang, *Chem. Commun.*, 2012, 48, 127-129.
9. Y. Qin, Y. Ma, X. Jin, L. Zhang, G. Ye and S. Zhao, *Anal. Chim. Acta*, 2015, 86, 84-89.
10. R. M. Kong, N. N. Sun, F. Qu, H. Wu, H. Wang and J. You, *RSC Adv.*, 2015, 5, 86849-86854.
11. H. Wang, W. Jiang, W. Li and L. Wang, *Sens. Actuators B*, 2017, 238, 318-324.
